# Supplementary material
Source: PubMed Central journal article supplement (PMC4114159)
Supplement: NIHMS594643-supplement-1.pdf [file NIHMS594643-supplement-1.pdf]

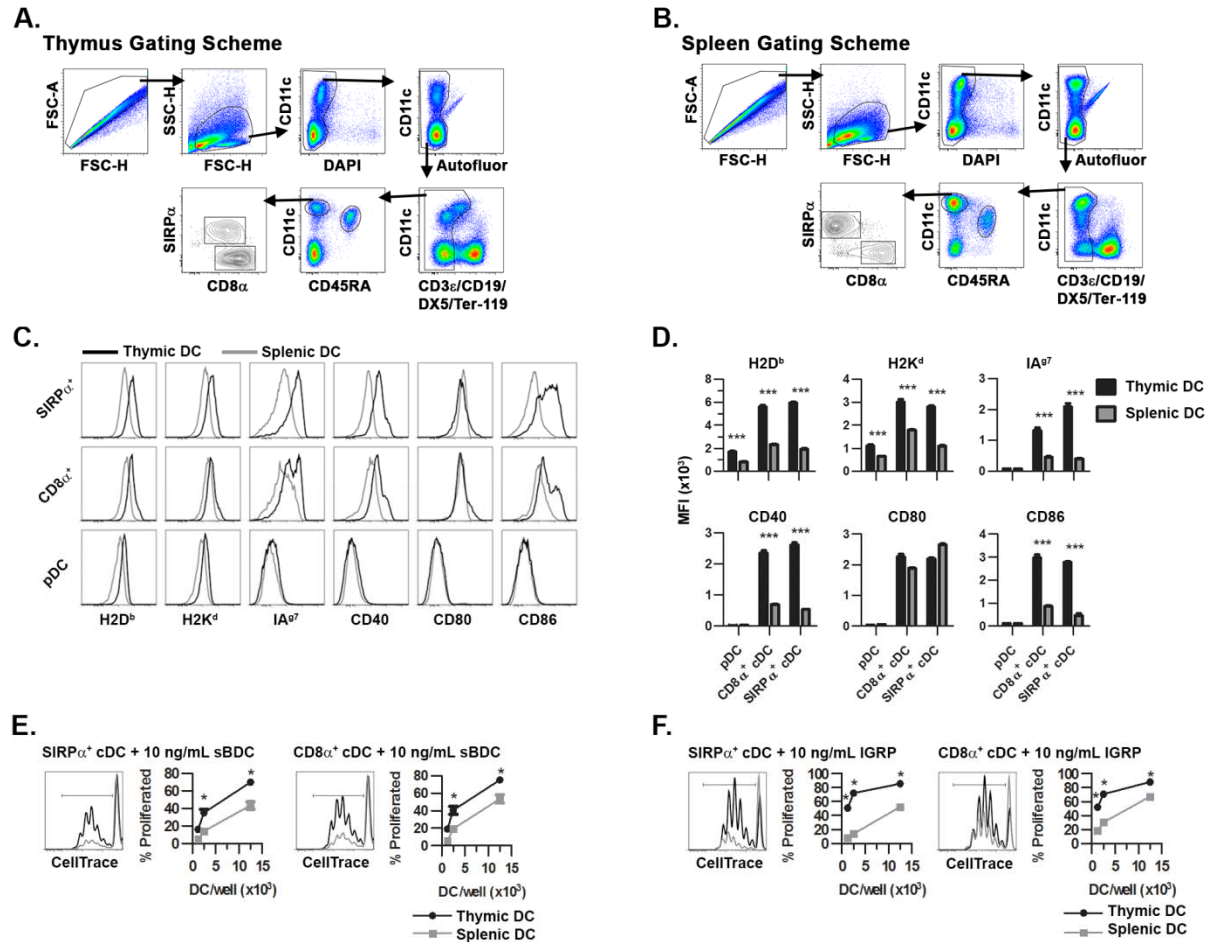

**Supplemental Figure 1. NOD thymic DC are phenotypically and functionally more mature than splenic DC.** Gating scheme for all analyses of DC from NOD mouse (A) thymus and (B) spleen following isolation as described in *Materials and Methods*. (C-D) Comparison of MHC I (H2D<sup>b</sup>, H2K<sup>d</sup>), MHC II (IA<sup>g7</sup>), CD40, CD80, and CD86 expression by NOD thymic and splenic DC (n=4). Data are representative of at least 4 experiments. (E-F) Thymic and splenic cDC subsets were FACS-sorted, pulsed with (E) sBDC or (F) IGRP peptide, then co-cultured with (E) BDC2.5 CD4<sup>+</sup> or (F) 8.3 CD8<sup>+</sup> T cells for 3 d. Proliferation of live Thy1.2<sup>+</sup>CD4<sup>+</sup> or CD8<sup>+</sup> T cells was determined via CellTrace Violet dilution. Plasmacytoid DC induced no proliferation under the conditions tested (data not shown). Graphed data are pooled from 2 independent experiments. \*, P<0.05; \*\*\*, P<0.001 by two-way ANOVA with Bonferroni posttest.

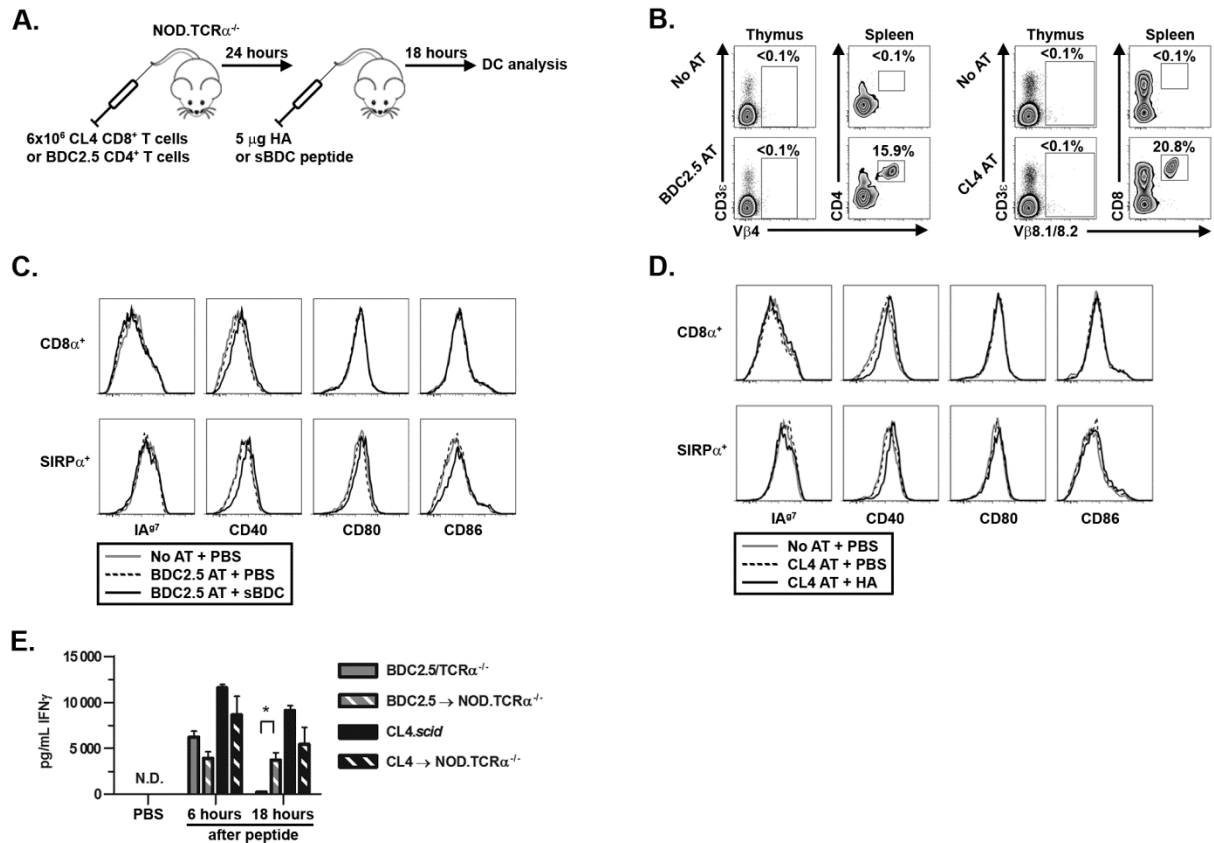

## Supplemental Figure 2. Activation of peripheral T cells alone does not activate thymic DC.

(A) Experimental design to determine if peripheral T cell activation leads to thymic DC activation. (B) Detection of transferred T cells by characteristic TCR V $\beta$  staining. Thymus panels were gated on total, live thymocytes; spleen panels were gated on live, CD3 $\epsilon^{+}$ Thy1.2 $^{hi}$  cells. AT, Adoptive Transfer. (C-D) Analysis of thymic DC phenotype in NOD.TCR $\alpha^{-/-}$  mice that received (C) BDC2.5 CD4 $^{+}$  T cells and 5  $\mu$ g sBDC or (D) CL4 CD8 $^{+}$  T cells and 5  $\mu$ g HA as described in panel A. (E) IFN $\gamma$  concentration in the serum of T cell-injected NOD.TCR $\alpha^{-/-}$  recipients or BDC2.5/TCR $\alpha^{-/-}$  and CL4.scid mice injected with peptide ( $n=3-6$ /group). \*,  $P < 0.05$  by two-way repeated measures ANOVA with Bonferroni posttest.
